# Supplementary material for: The TNFR family members OX40 and CD27 link viral virulence to protective T cell vaccines in mice
Source: JCI journal article supplement (doi:10.1172/jci42056), 2010-12-23
Supplement: sd1 [file 1]

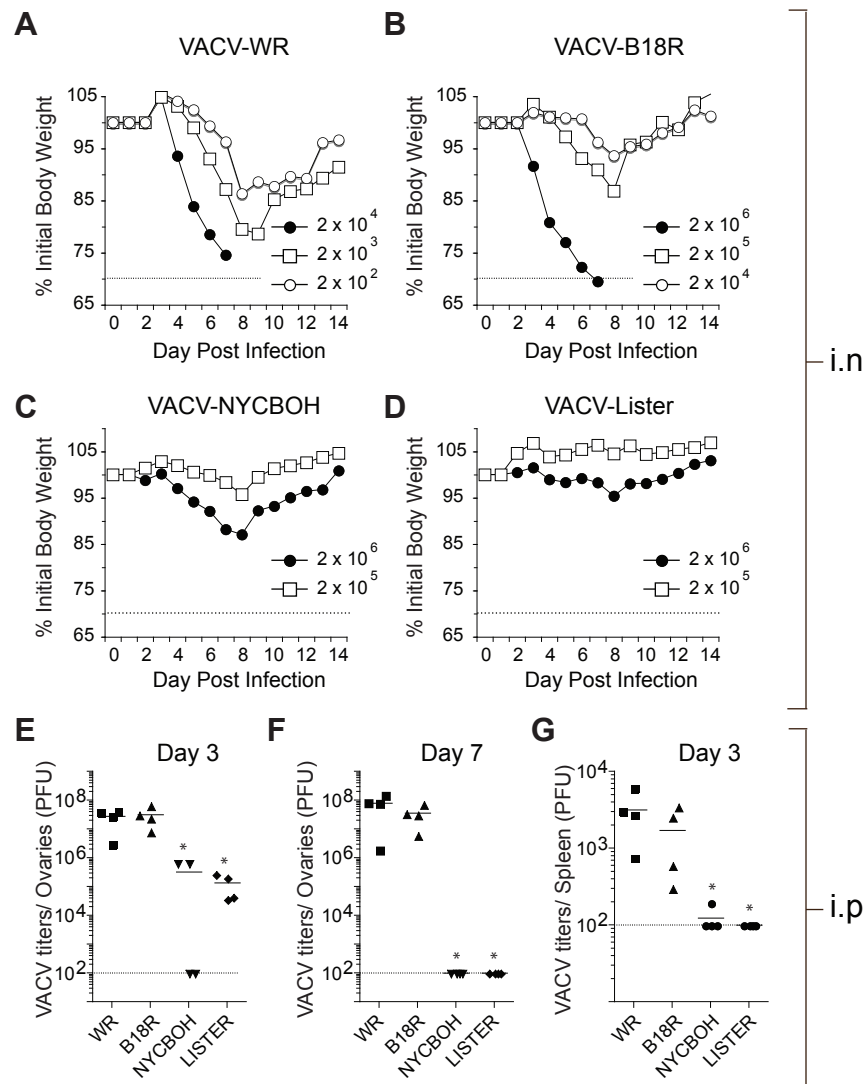

**Supplementary Figure 1. Similar virulence of VACV strains in BALB/c mice compared to C57BL/6.** (a-d) BALB/c mice were infected i.n. with VACV-WR ( $2 \times 10^2$ - $10^4$  PFU/mouse), VACV-B18R ( $2 \times 10^4$ - $10^6$  PFU), VACV-Lister ( $10^5$  or  $10^6$  PFU), and VACV-NYCBOH ( $10^5$  or  $10^6$  PFU) as indicated. Animals were weighed daily. Mean % of initial body weight. Results are mean number  $\pm$  SEM for each group ( $n=4$  mice/group) from one of two experiments. (e-g) BALB/c mice were infected i.p. with different strains of VACV ( $2 \times 10^5$  PFU/mouse). On indicated days post infection, ovaries (e and f) and spleens (g) were removed from individual mice and VACV-titers determined as described in methods. Results are mean number  $\pm$  SEM for each group ( $n=4$  mice/group) from one of two experiments. \*,  $p < 0.05$  (VACV-WR vs VACV-B18R or VACV-Lister or VACV-NYCBOH).

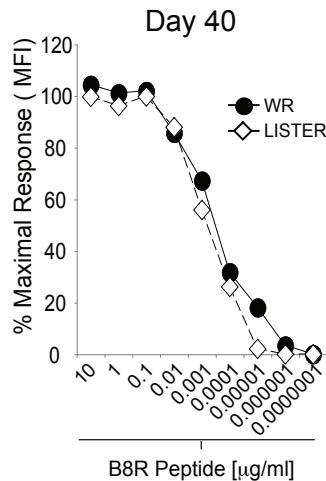

**Supplementary Figure 2. Reactivity of B8R-specific CD8 T cells in VACV-WR and Lister infected WT mice.** Groups of WT mice were infected i.p with VACV-WR or Lister ( $2 \times 10^5$  PFU/mouse). Forty days post infection splenocytes were harvested and stimulated for 6 h with graded concentrations of B8R peptide as indicated. CD8 T cell reactivity was assessed by mean fluorescent intensity (MFI) for intracellular IFN- $\gamma$  on a per cell basis. The MFI of cytokine-positive B8R-specific CD8 T cells were plotted against the peptide concentration used to stimulate the cells. Results are mean number  $\pm$  SEM ( $n = 4$  mice/group) from one experiment.
